# Supplementary material
Source: PubMed Central journal article supplement (PMC4793691)

# Web figure: Branching structure of symptom control advice for each Antibiotic group illustrated by the No prescription group

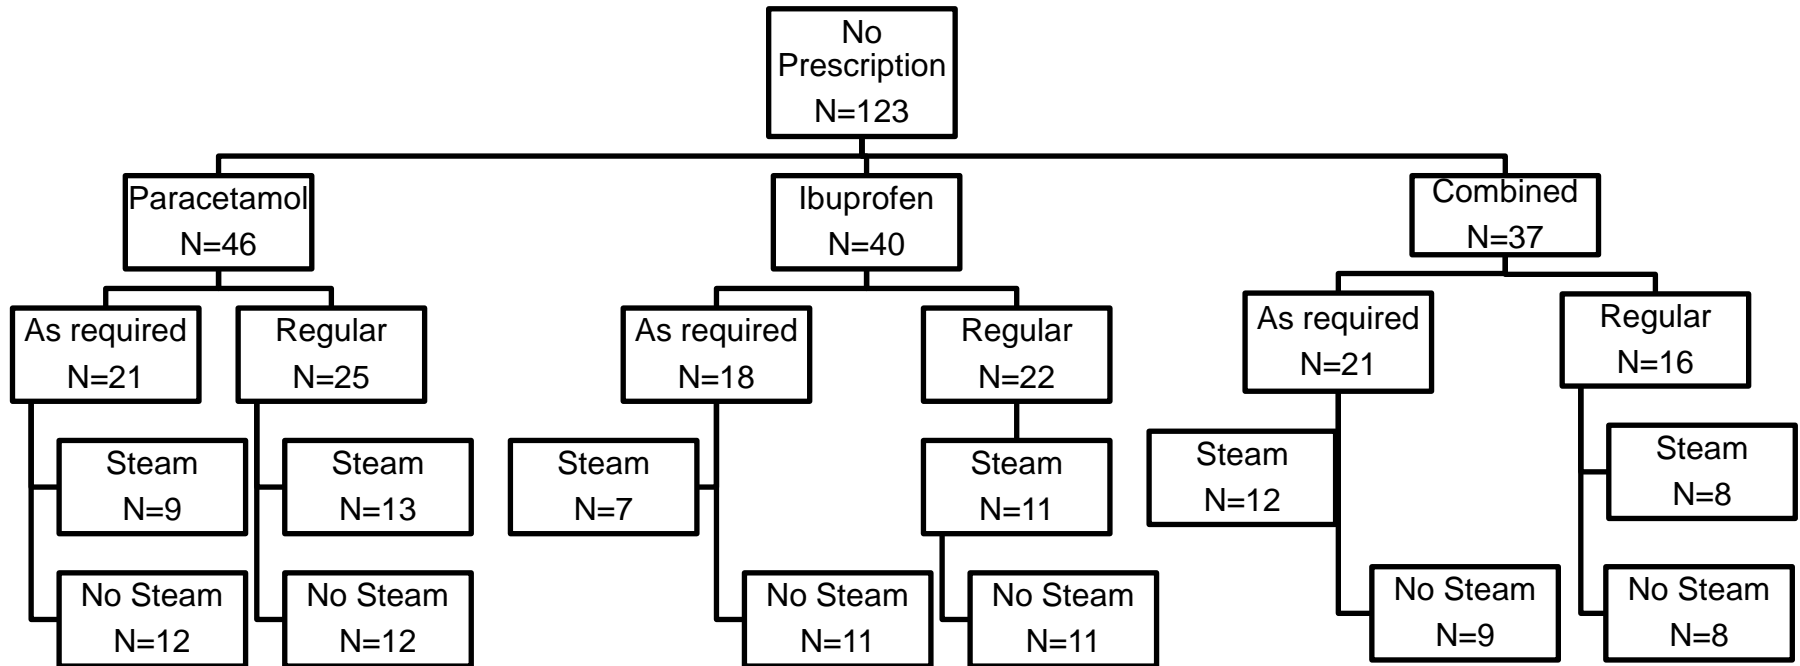

Supplement: litp015183.wf_default.pdf [file litp015183.wf_default.pdf]
